# Supplementary material
Source: Springer Nature journal article supplement (https://www.springermedizin.de/resource/supplementary/13013_2011_545_MOESM4_ESM.pdf/9631906)

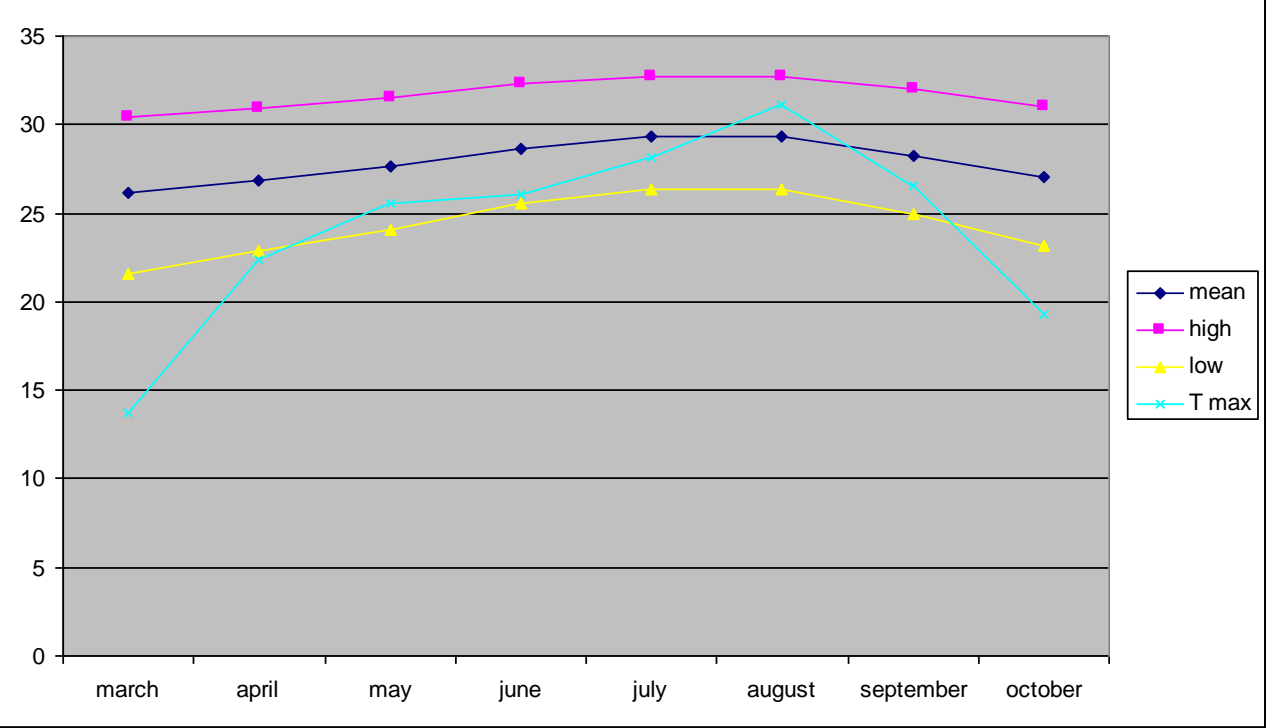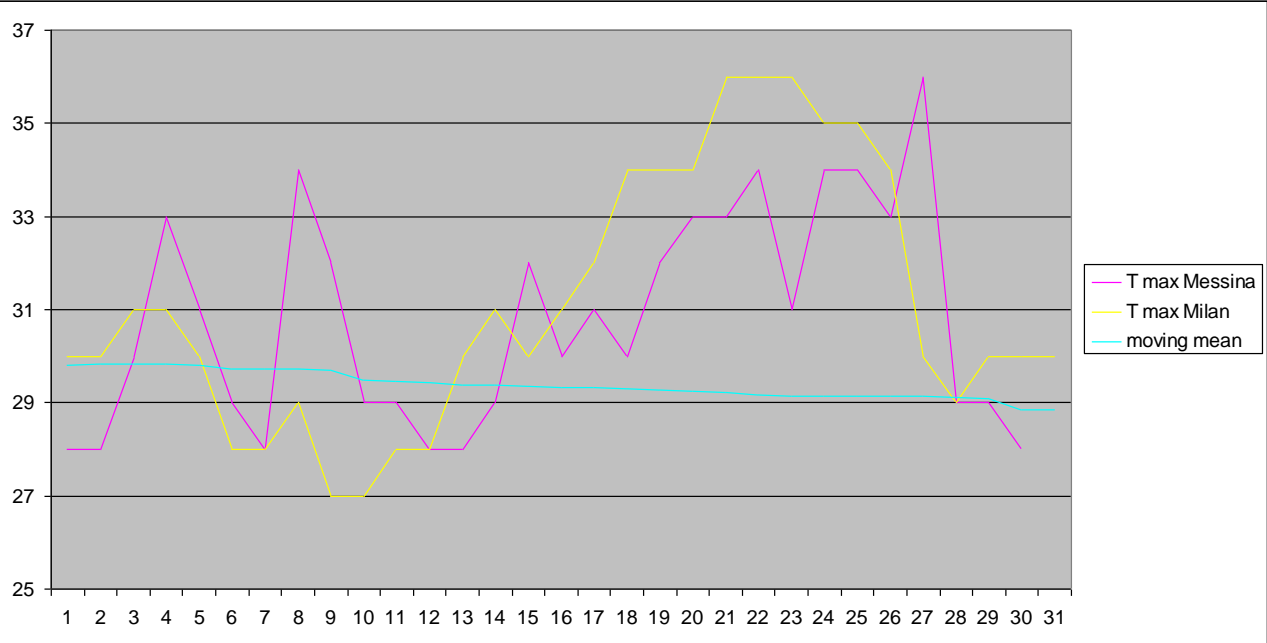

Supplement: MOESM4 [file 9631906]
